# Supplementary material for: Cell-cycle regulated transcription associates with DNA replication timing in yeast and human
Source: PubMed Central journal article supplement (PMC3983658; doi:10.1186/gb-2013-14-10-r111), 2013-10-07

Figure S1

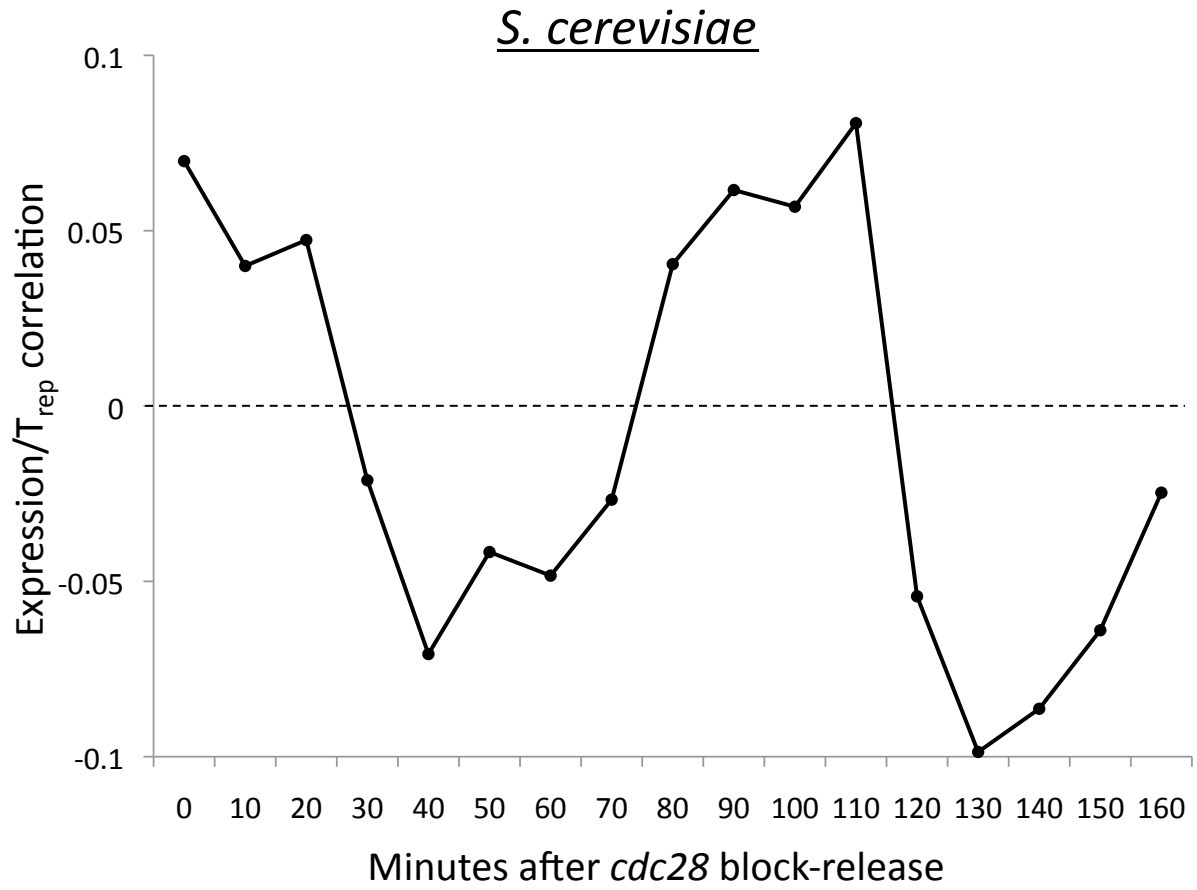

Figure S2

*S. pombe*

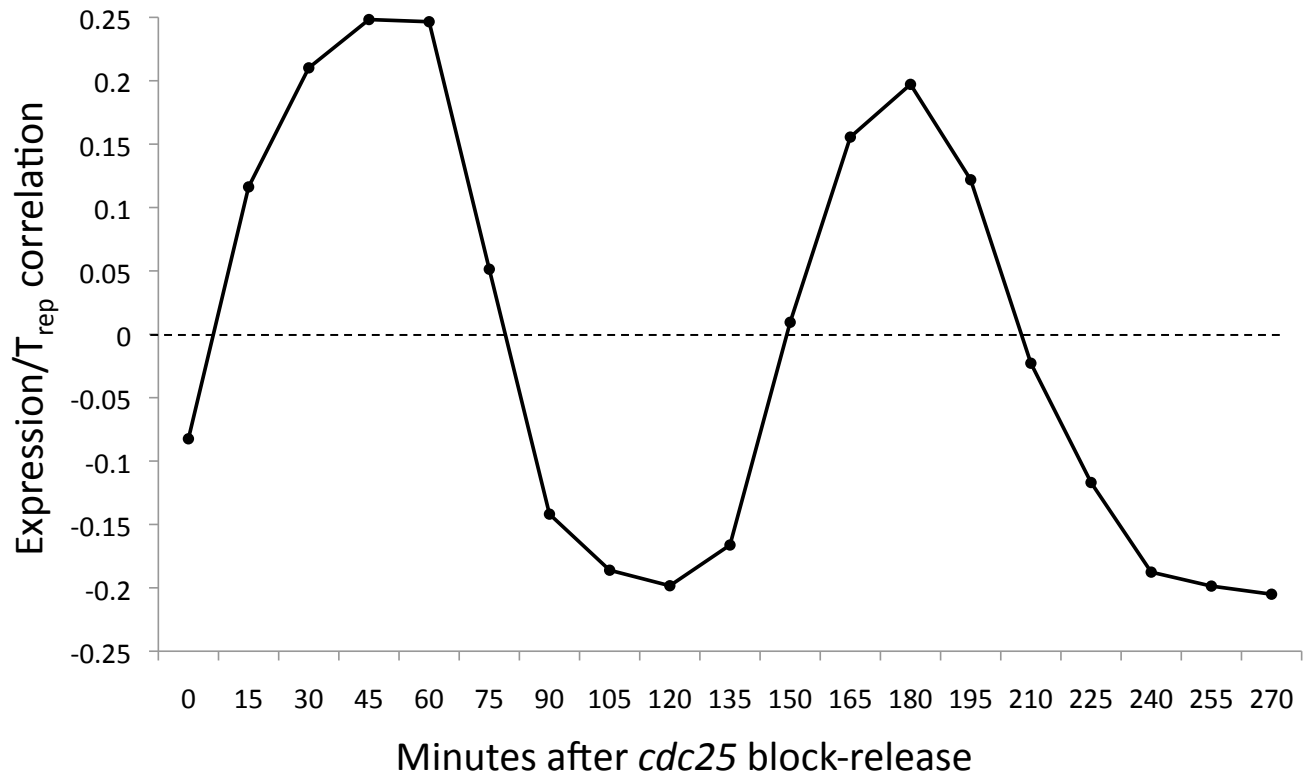

Figure S3

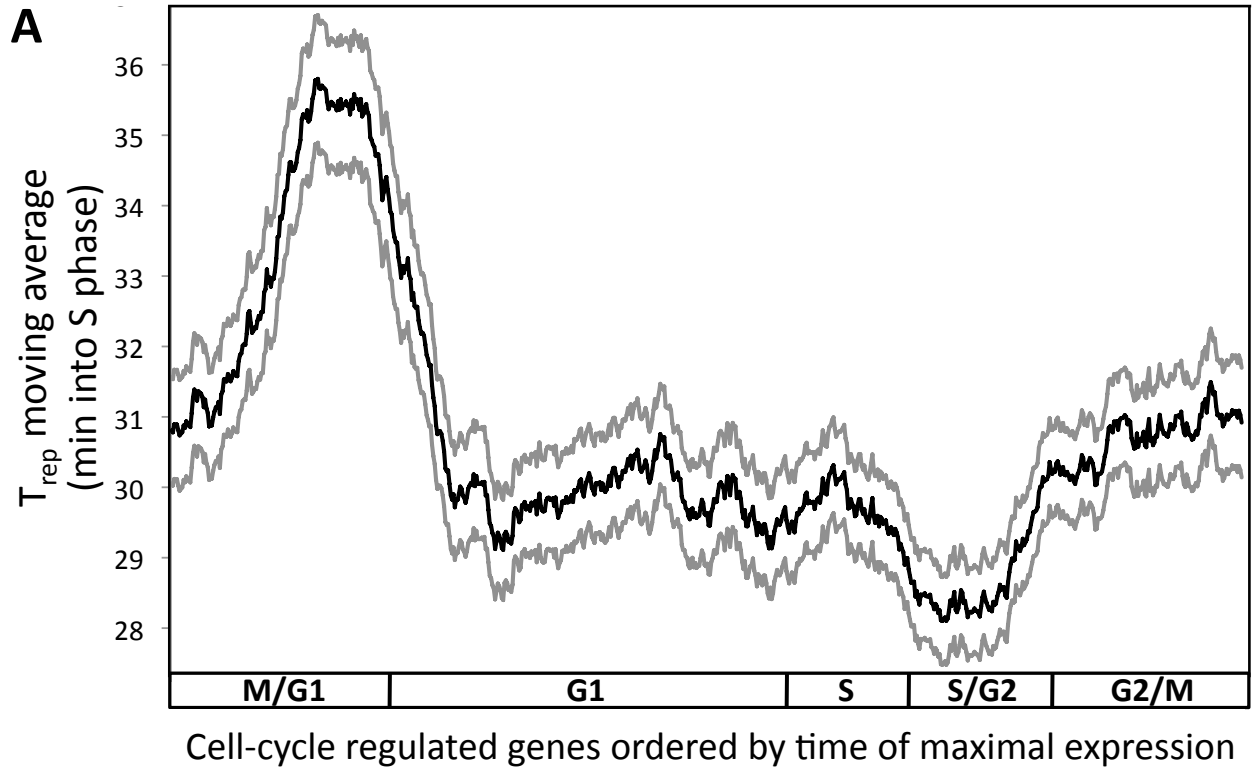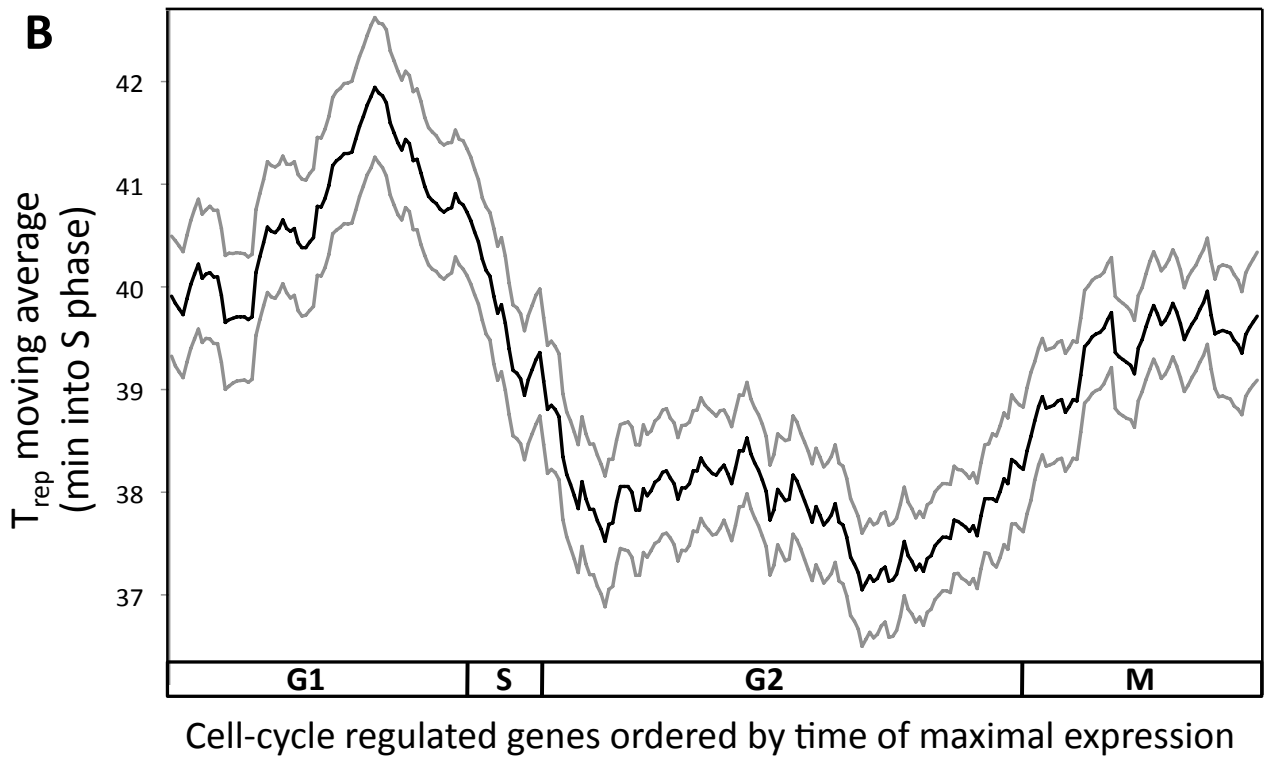

Figure S4

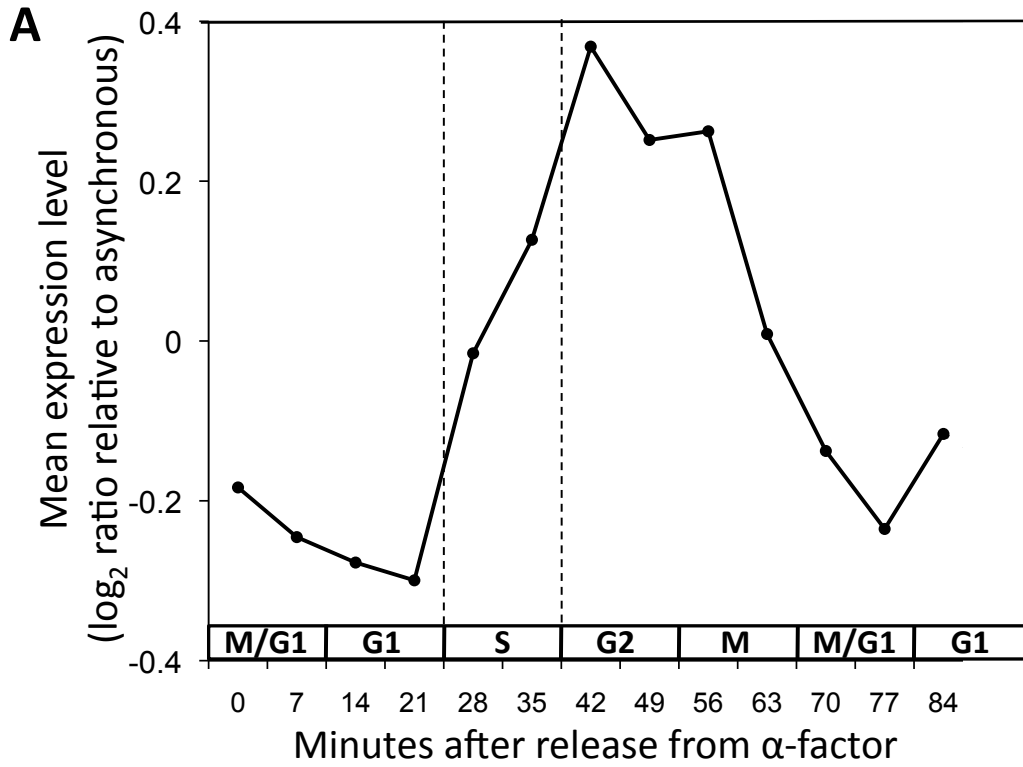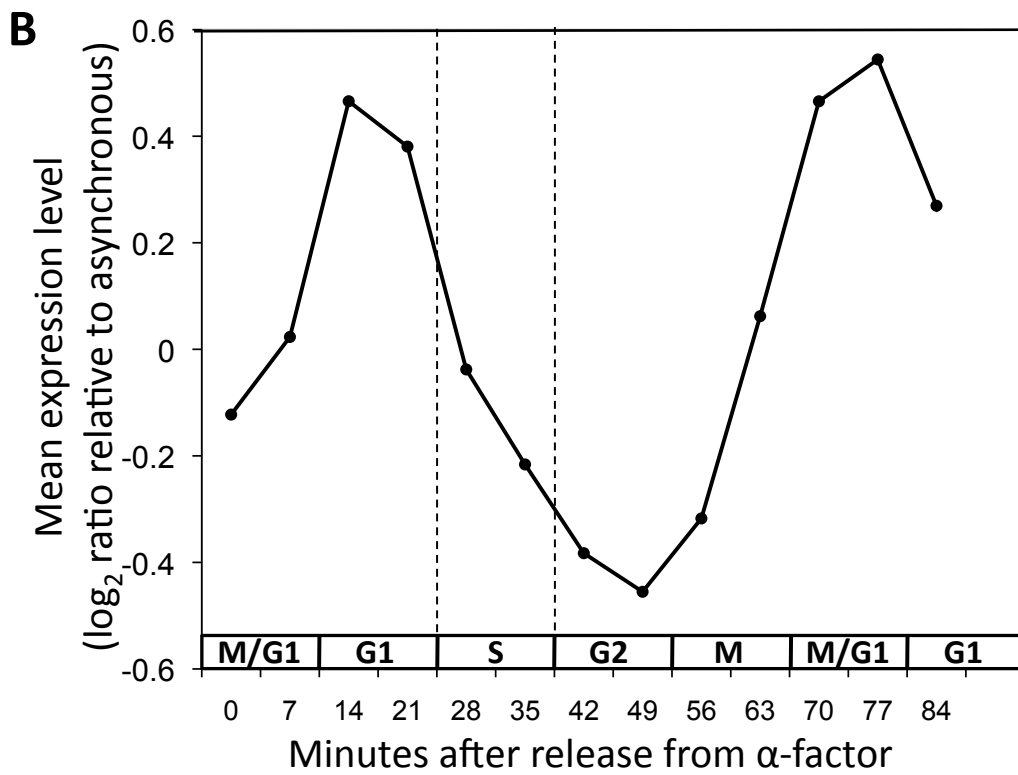

Figure S5

**A**

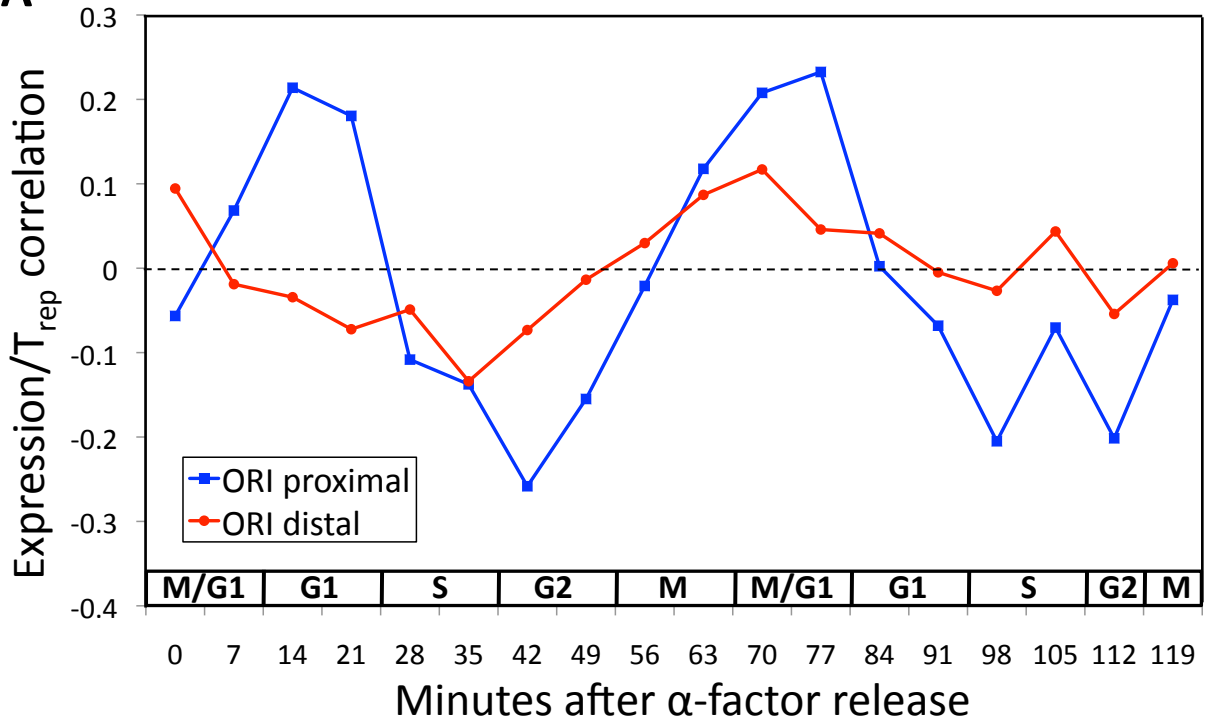

**B**

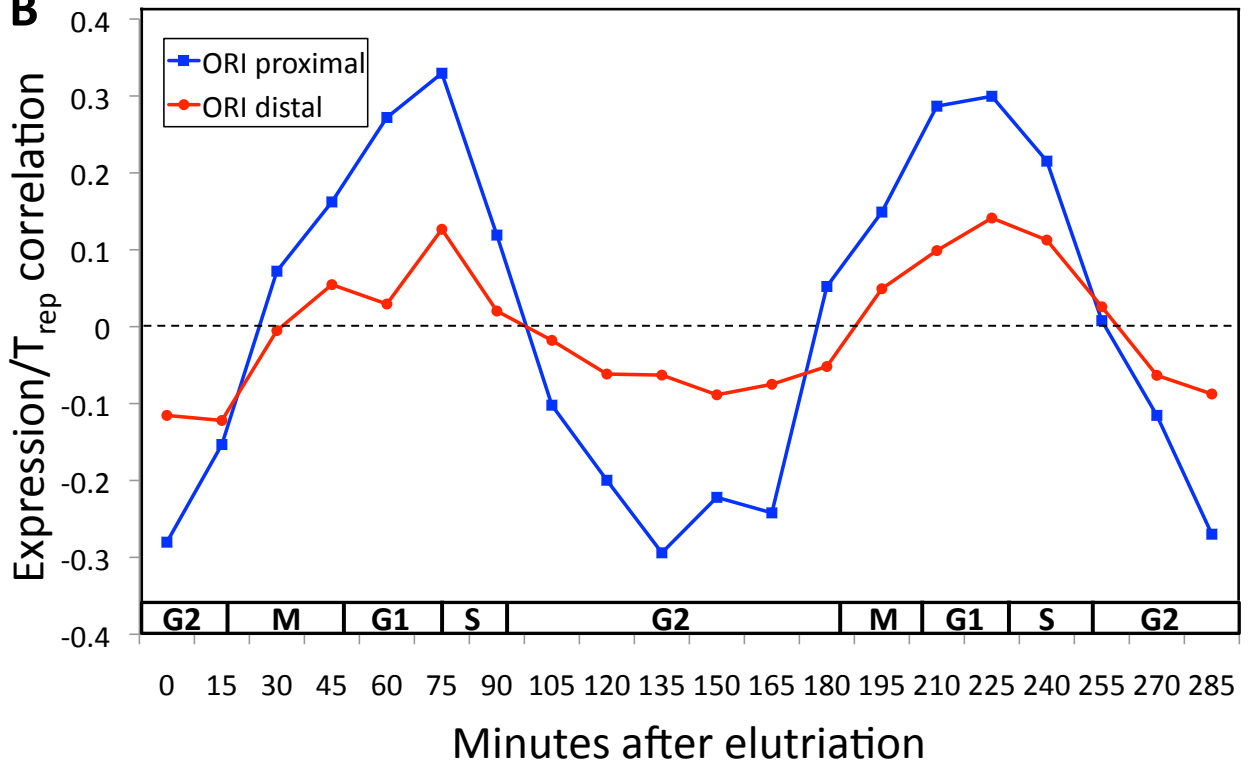

Supplement: gb-2013-14-10-r111-S1.pdf [file gb-2013-14-10-r111-S1.pdf]
